# Supplementary material for: Centromeric transposable elements and epigenetic status drive karyotypic variation in the eastern hoolock gibbon
Source: PubMed Central journal article supplement — bioRxiv. 2024 Aug 30:2024.08.29.610280. Preprint. [Version 1] doi: 10.1101/2024.08.29.610280 (PMC11384015; doi:10.1101/2024.08.29.610280), 2024-08-30

# Hartley, et al \_ Figure S1

**A.**

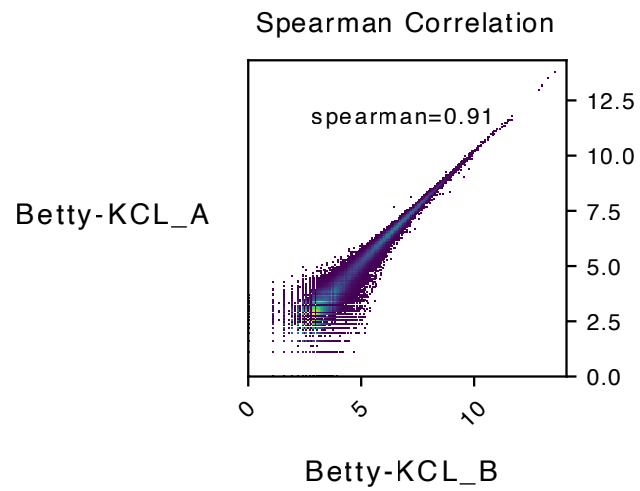

**B.**

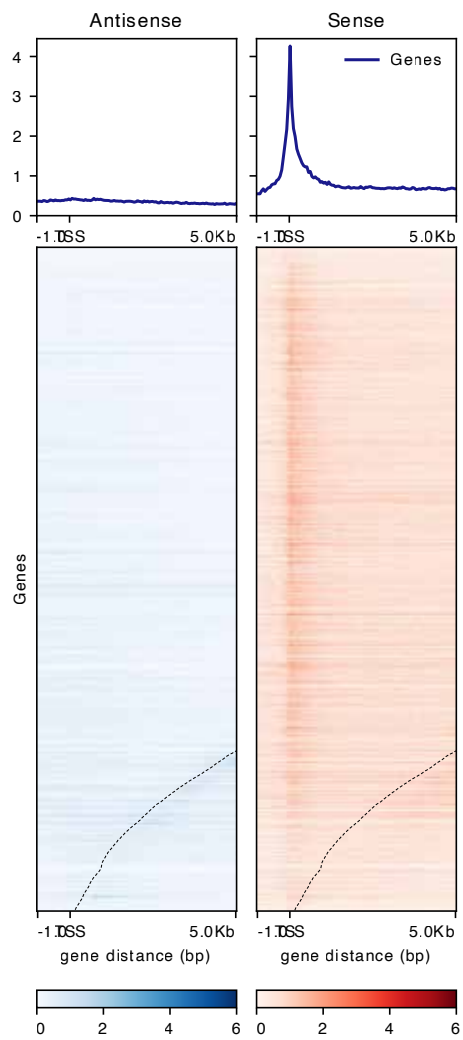

**C.**

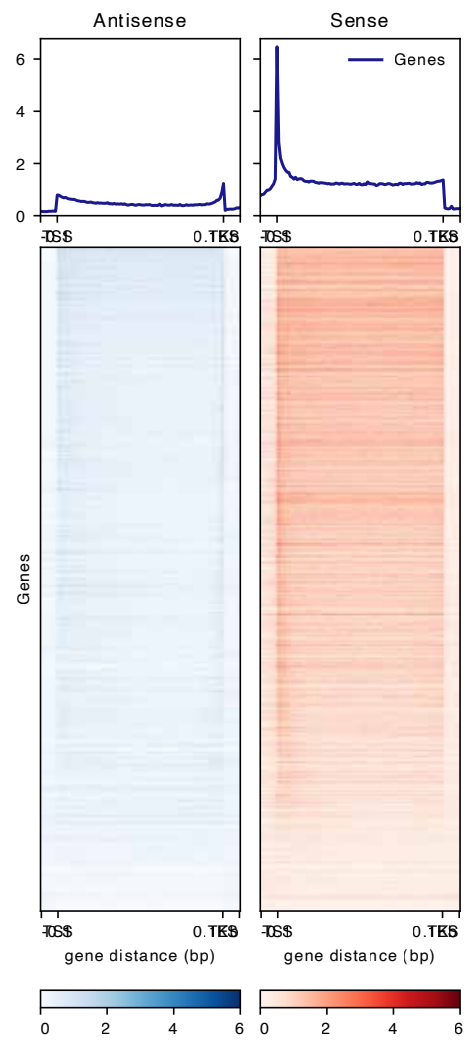

Hartley, et al \_ Figure S2

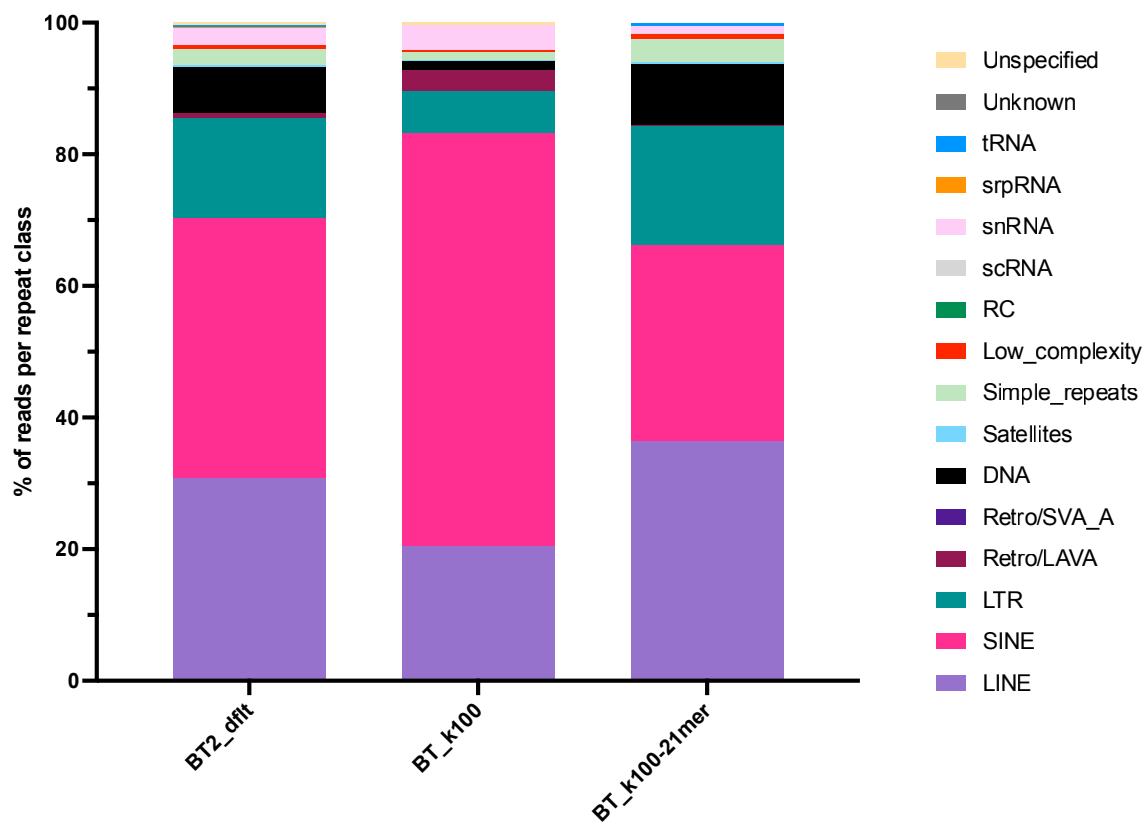



Hartley, et al \_ Figure S3

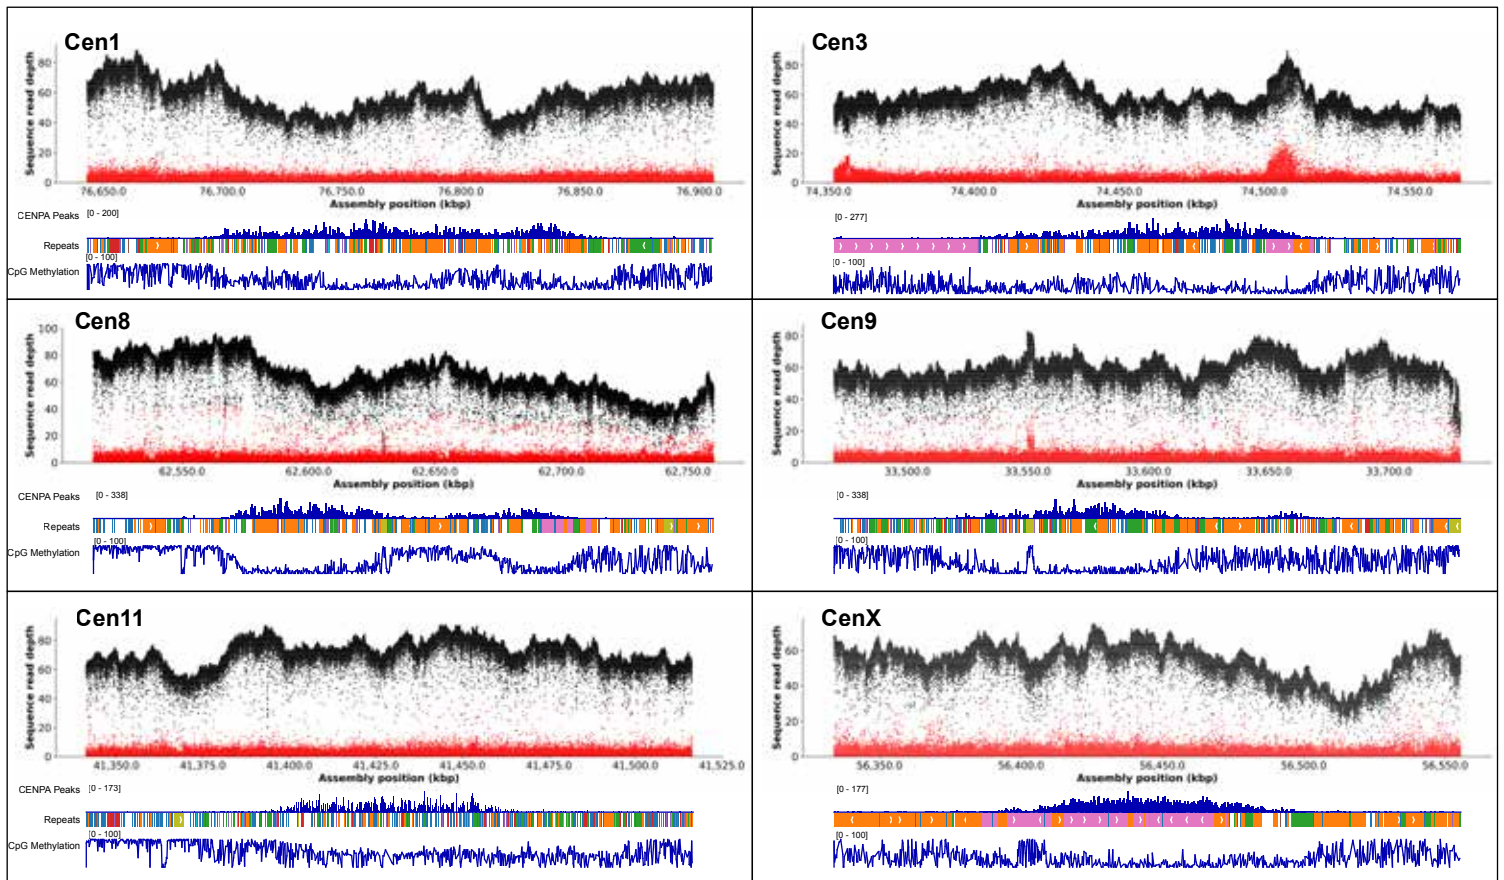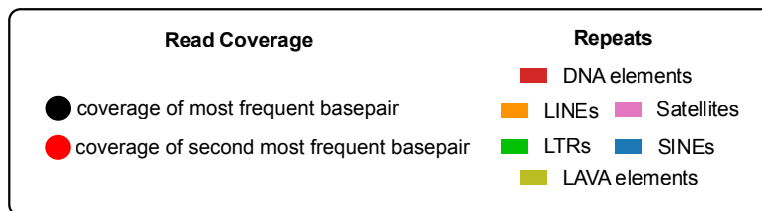

# Hartley, et al \_ Figure S4

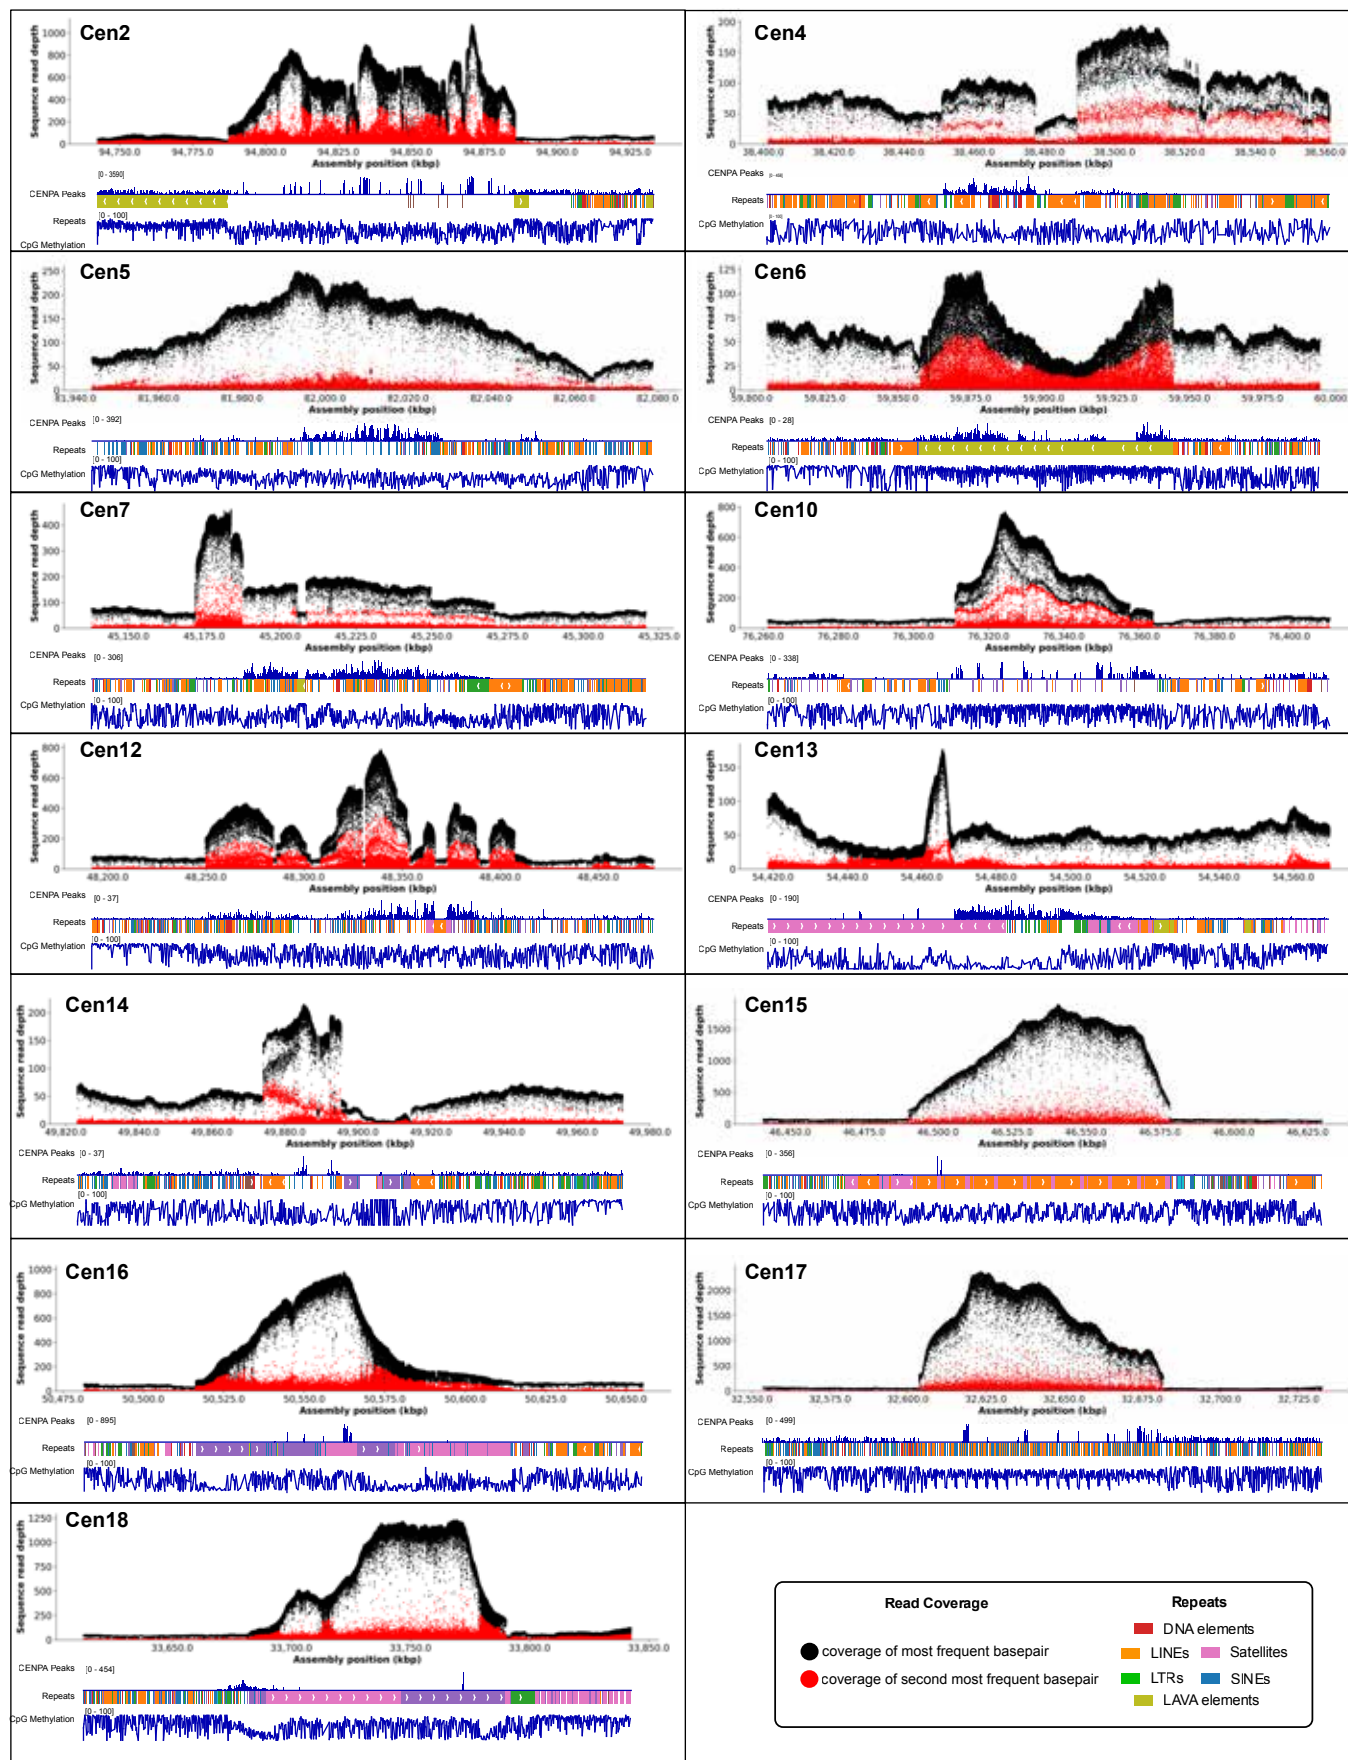

# Hartley, et al \_ Figure S5

**A.**

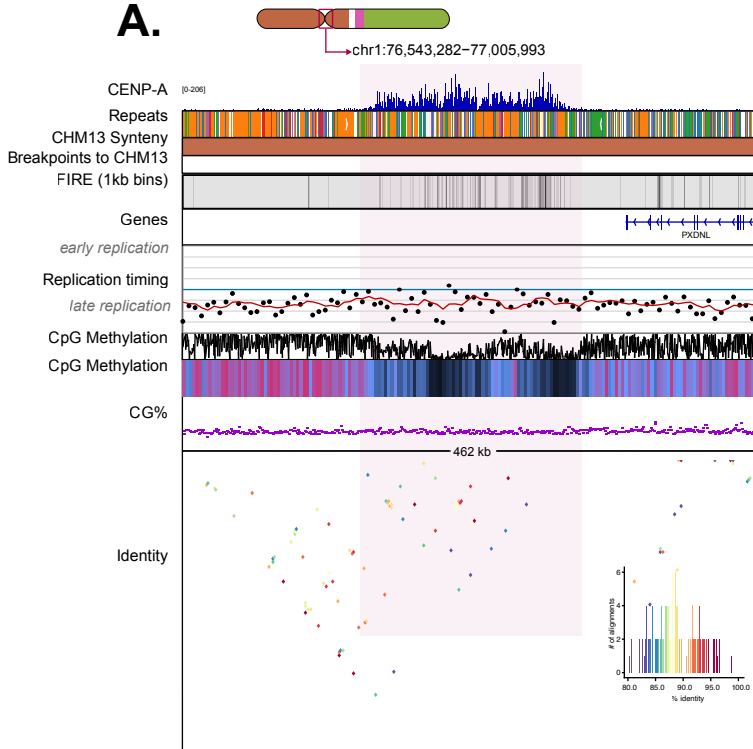

**B.**

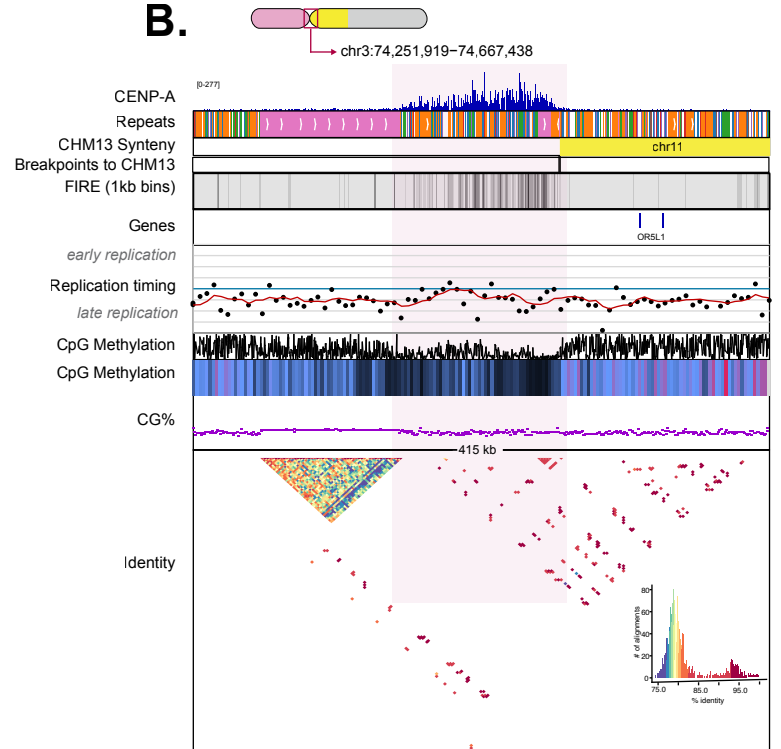

**C.**

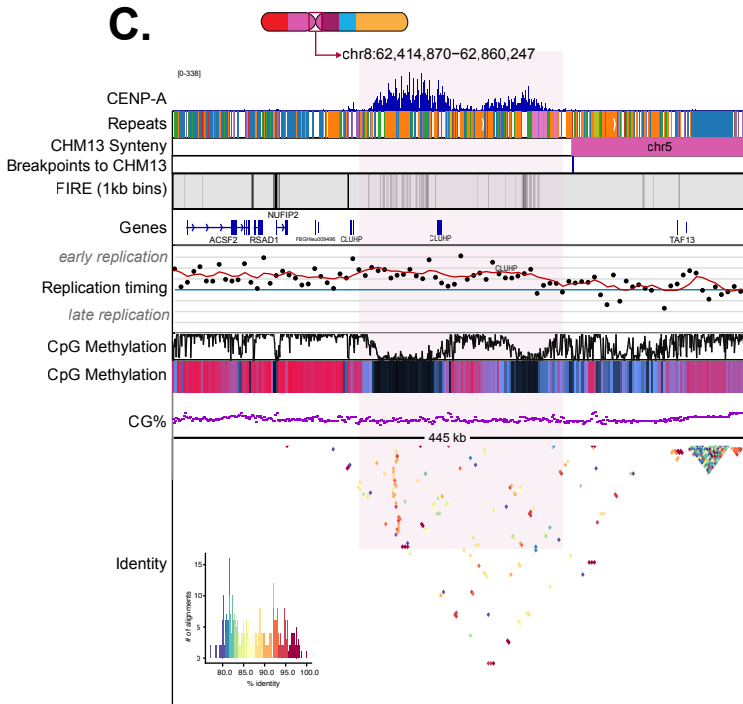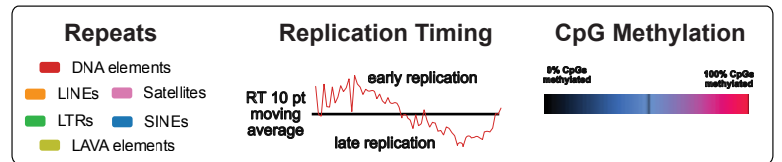

**D.**

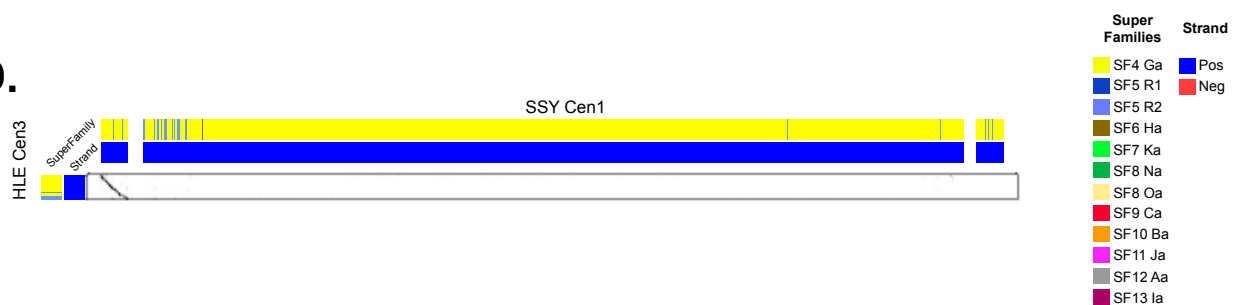

# Hartley et al, Figure S6

## A.

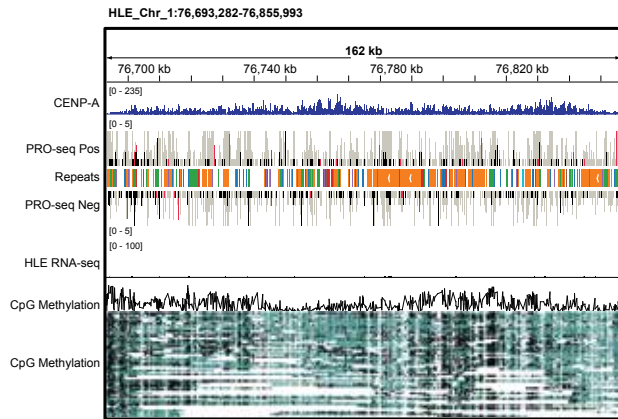

## B.

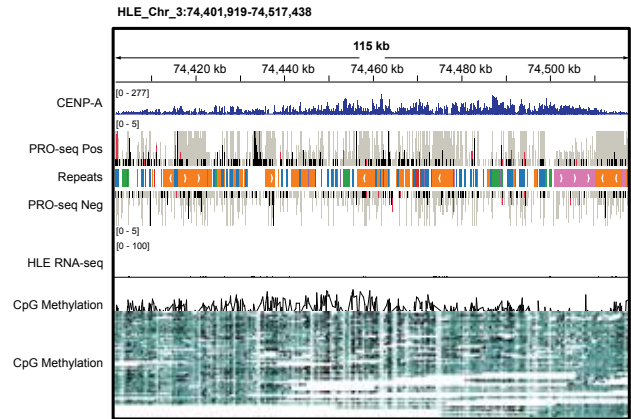

## C.

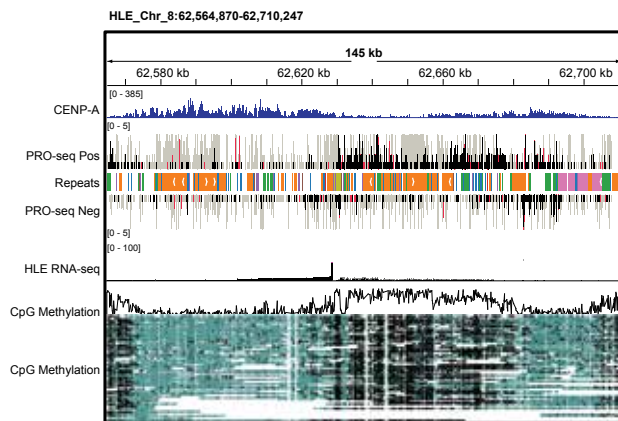

## D.

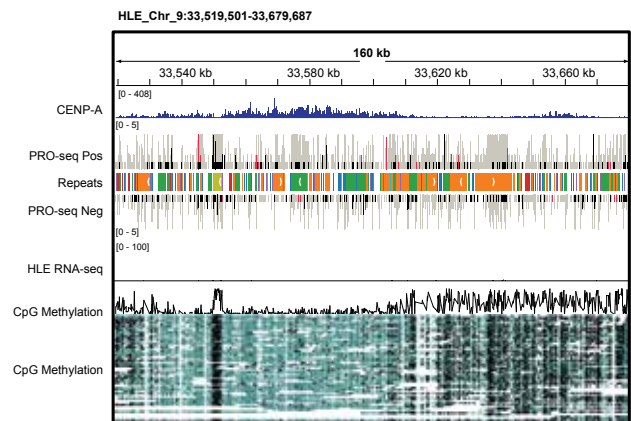

## E.

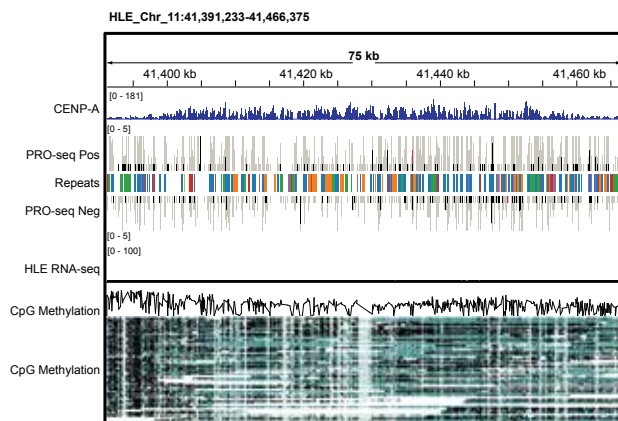

## F.

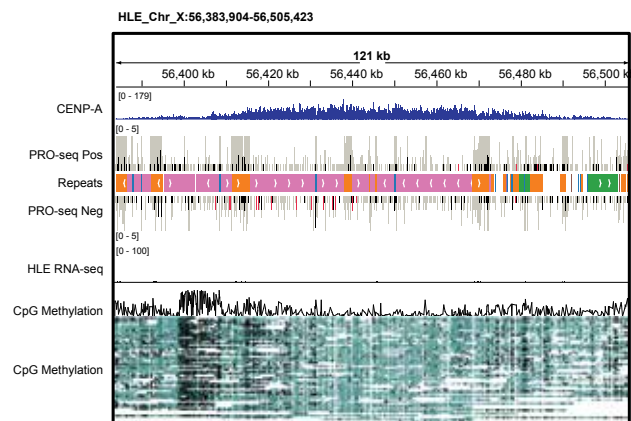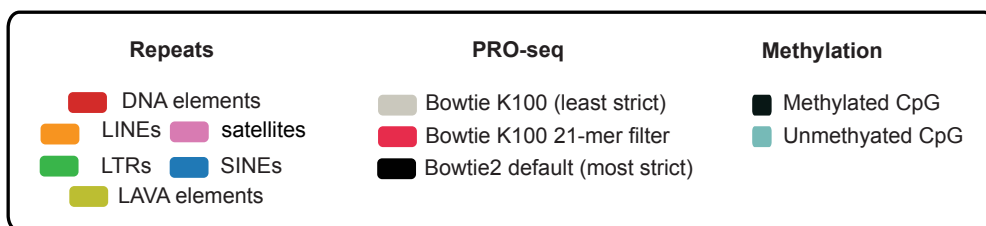

# Hartley et al, Figure S7

**A.**

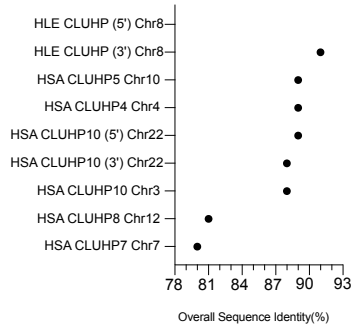

**B.**

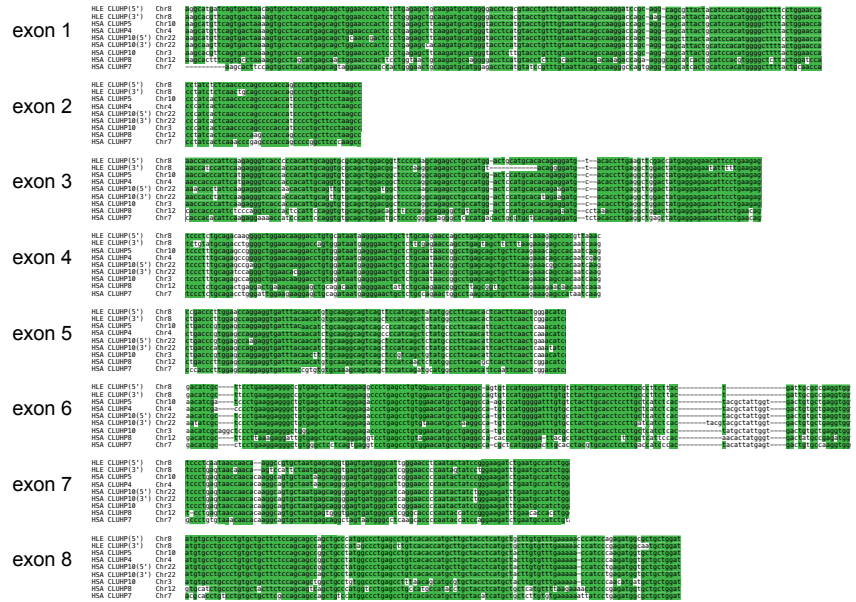



# Hartley et al, Figure S8

**A.**

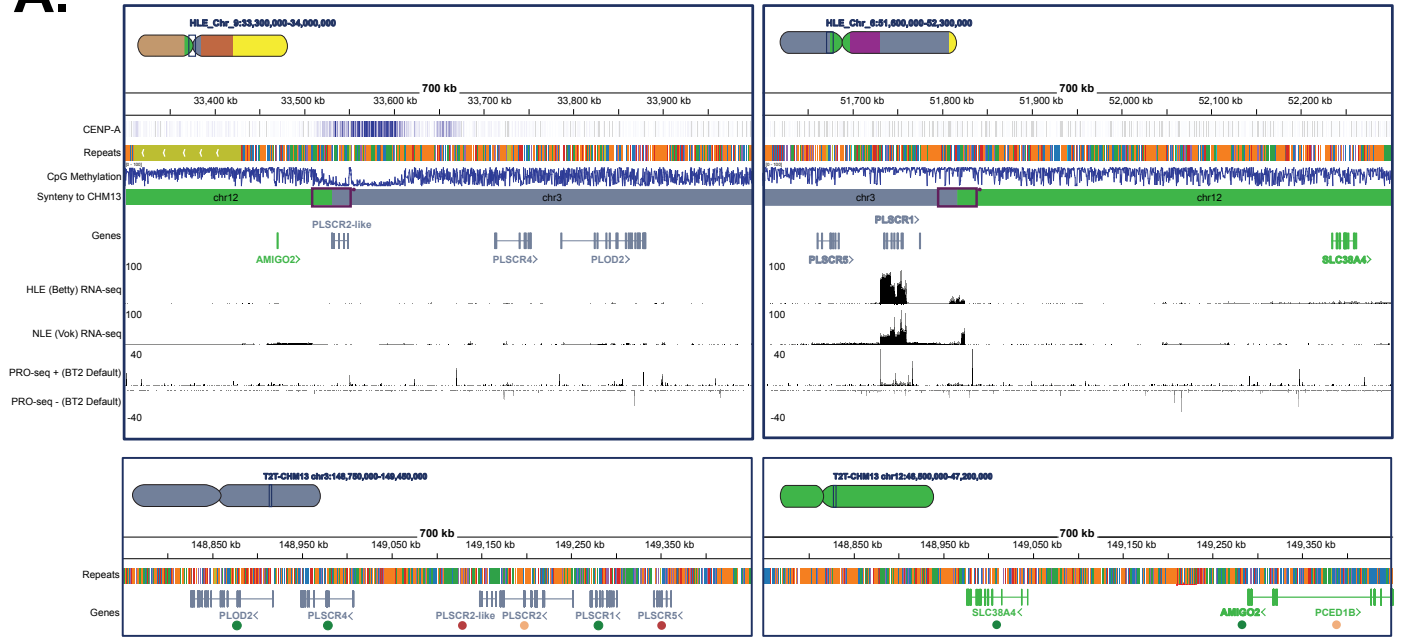

**B.**

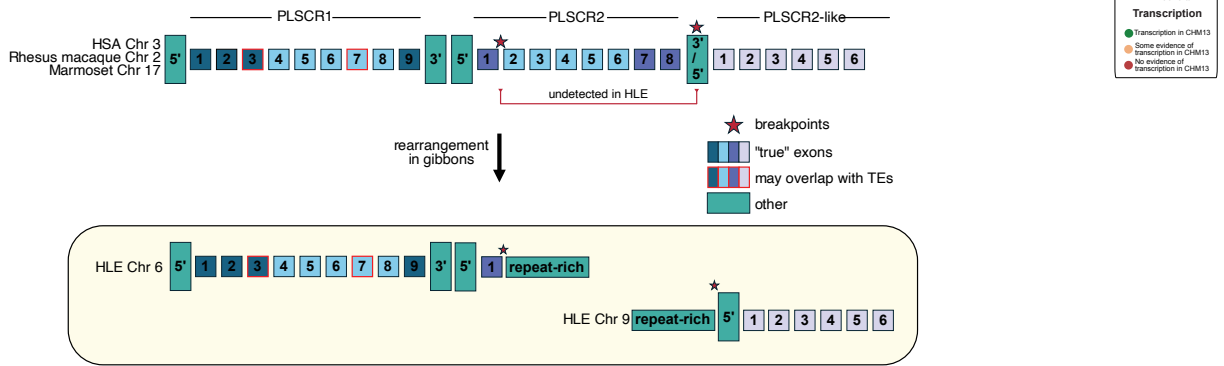

Hartley, et al Fig S9

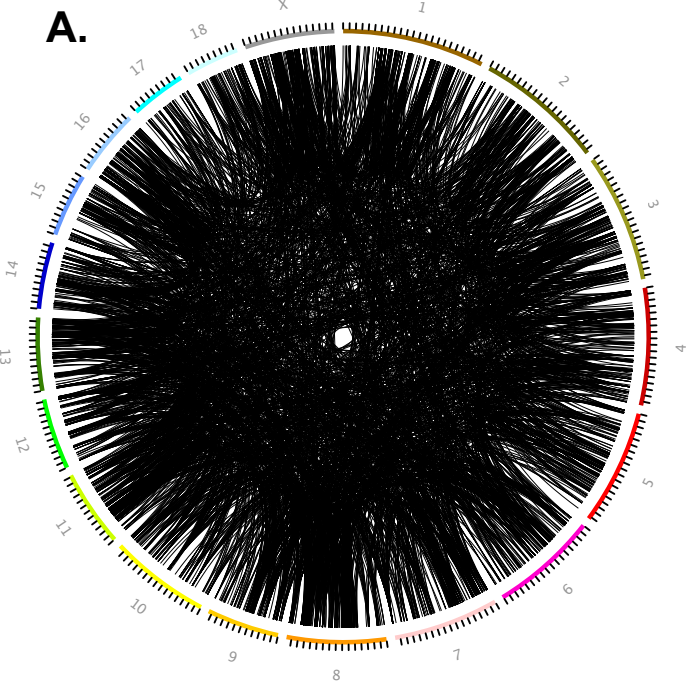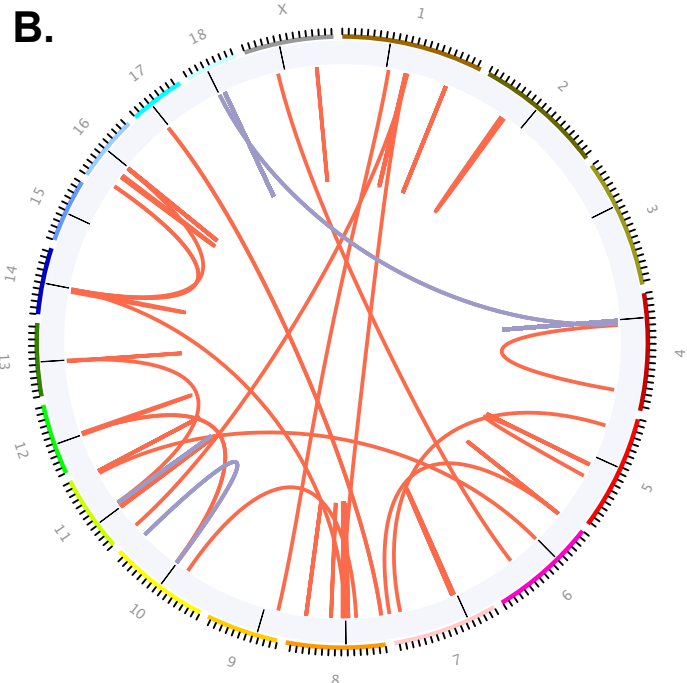

# Hartley et al, Figure S10

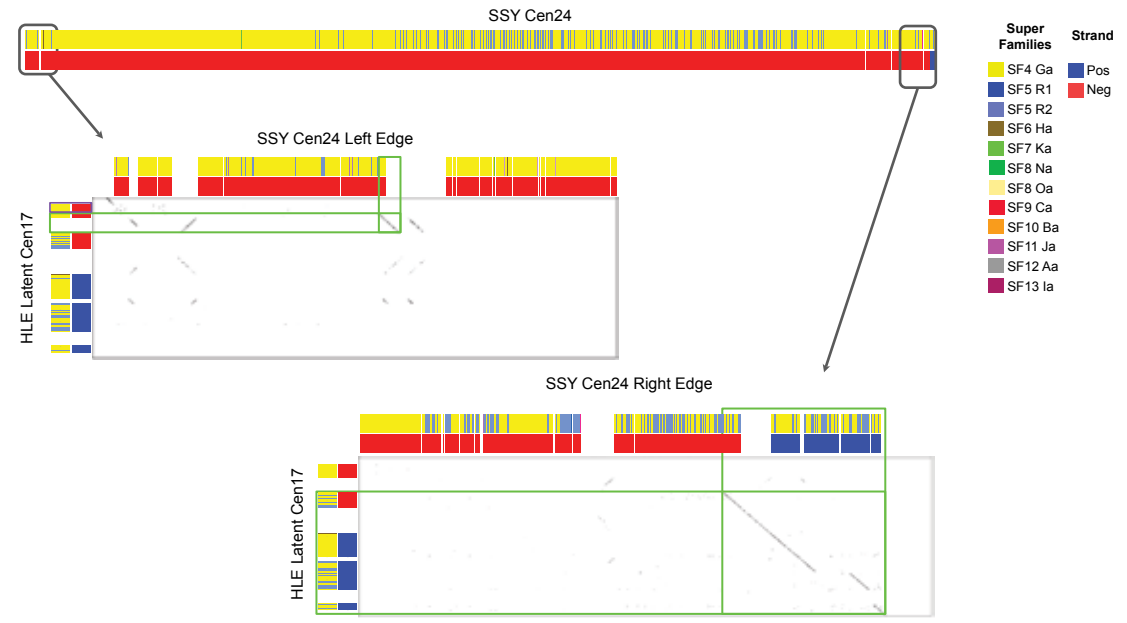



# Hartley et al, Figure S11

HLE Chr17:38,246,223-38,274,570

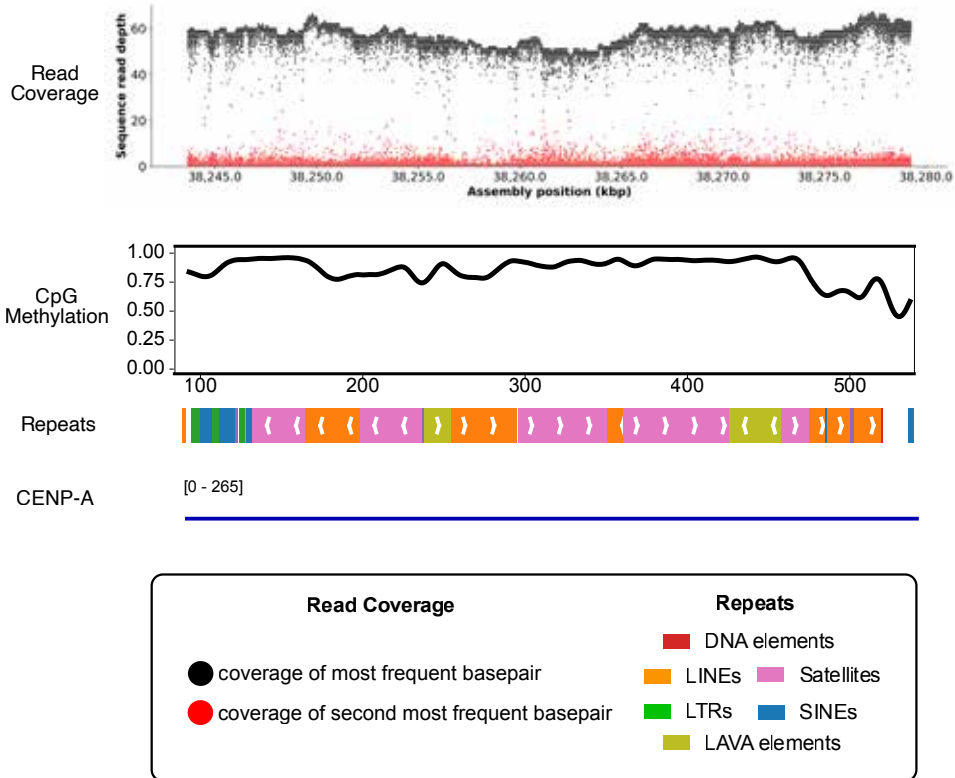

# Hartley et al, Figure S12

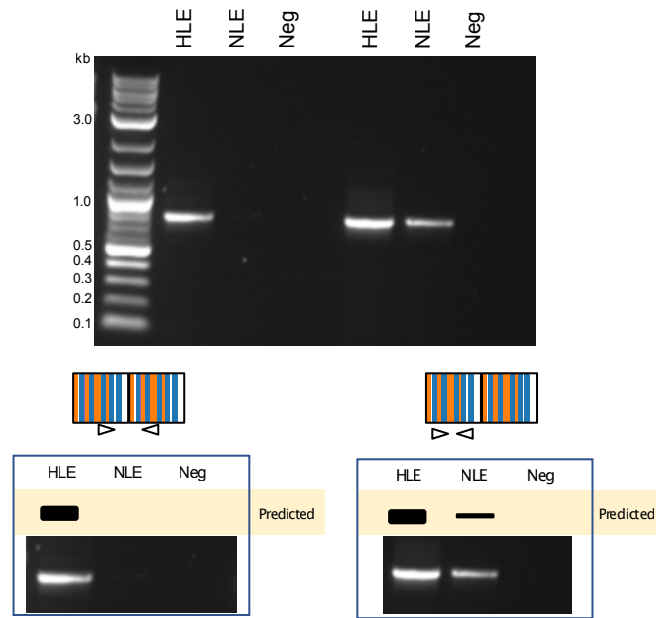

Hartley, et al \_ Figure S13

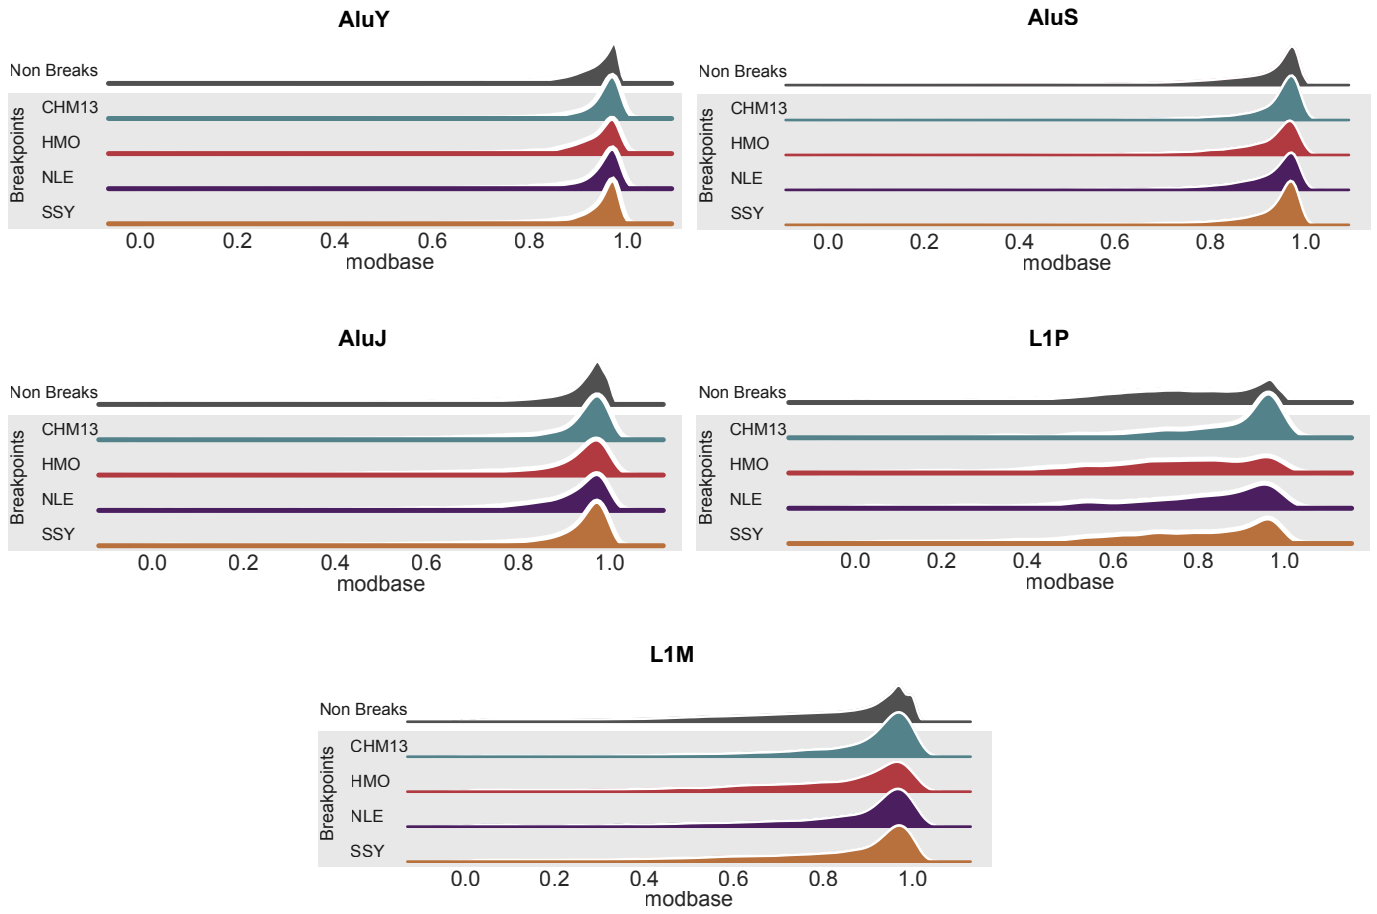

# Hartley, et al \_ Figure S14

closest\_boundary\_distance

- 25274.6
- 37642.2
- 100559

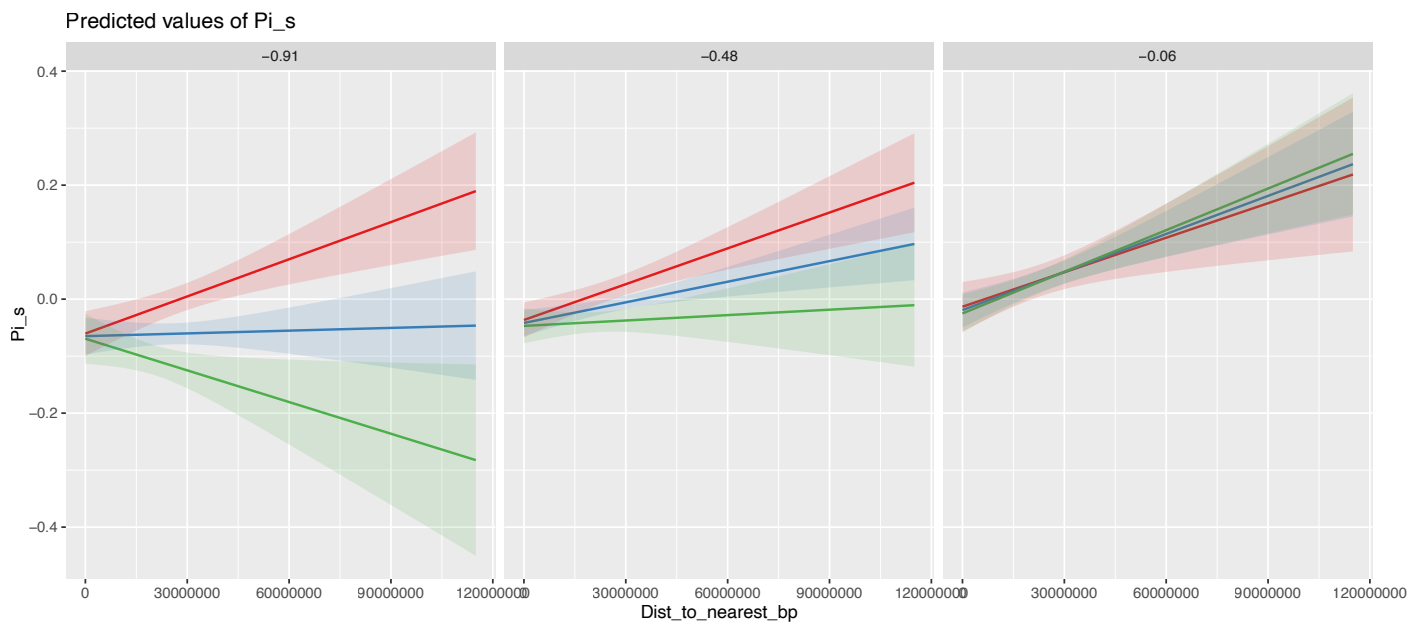

Hartley, et al \_ Figure S15

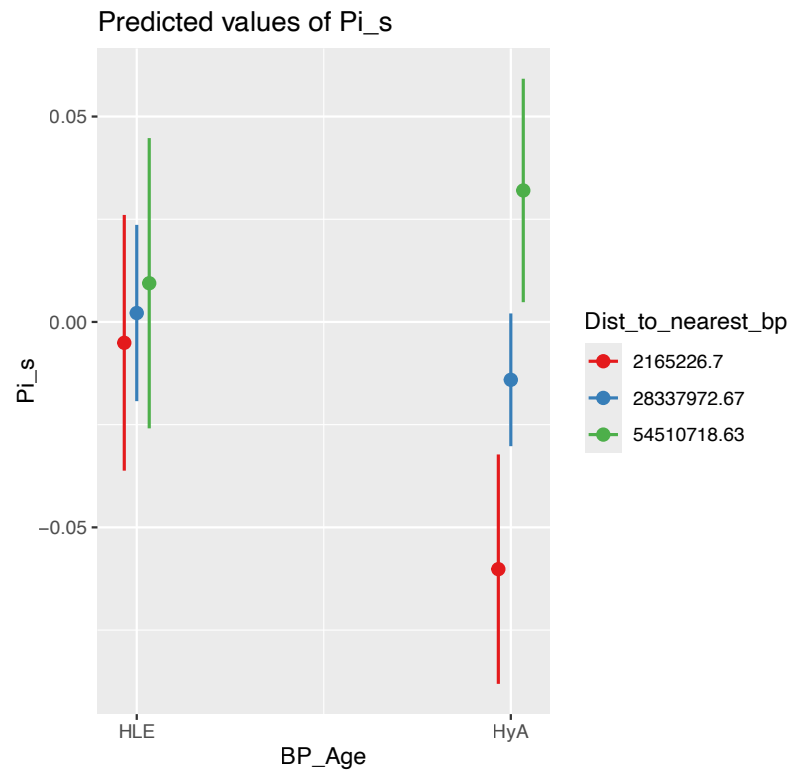

# Hartley, et al \_Figure S16

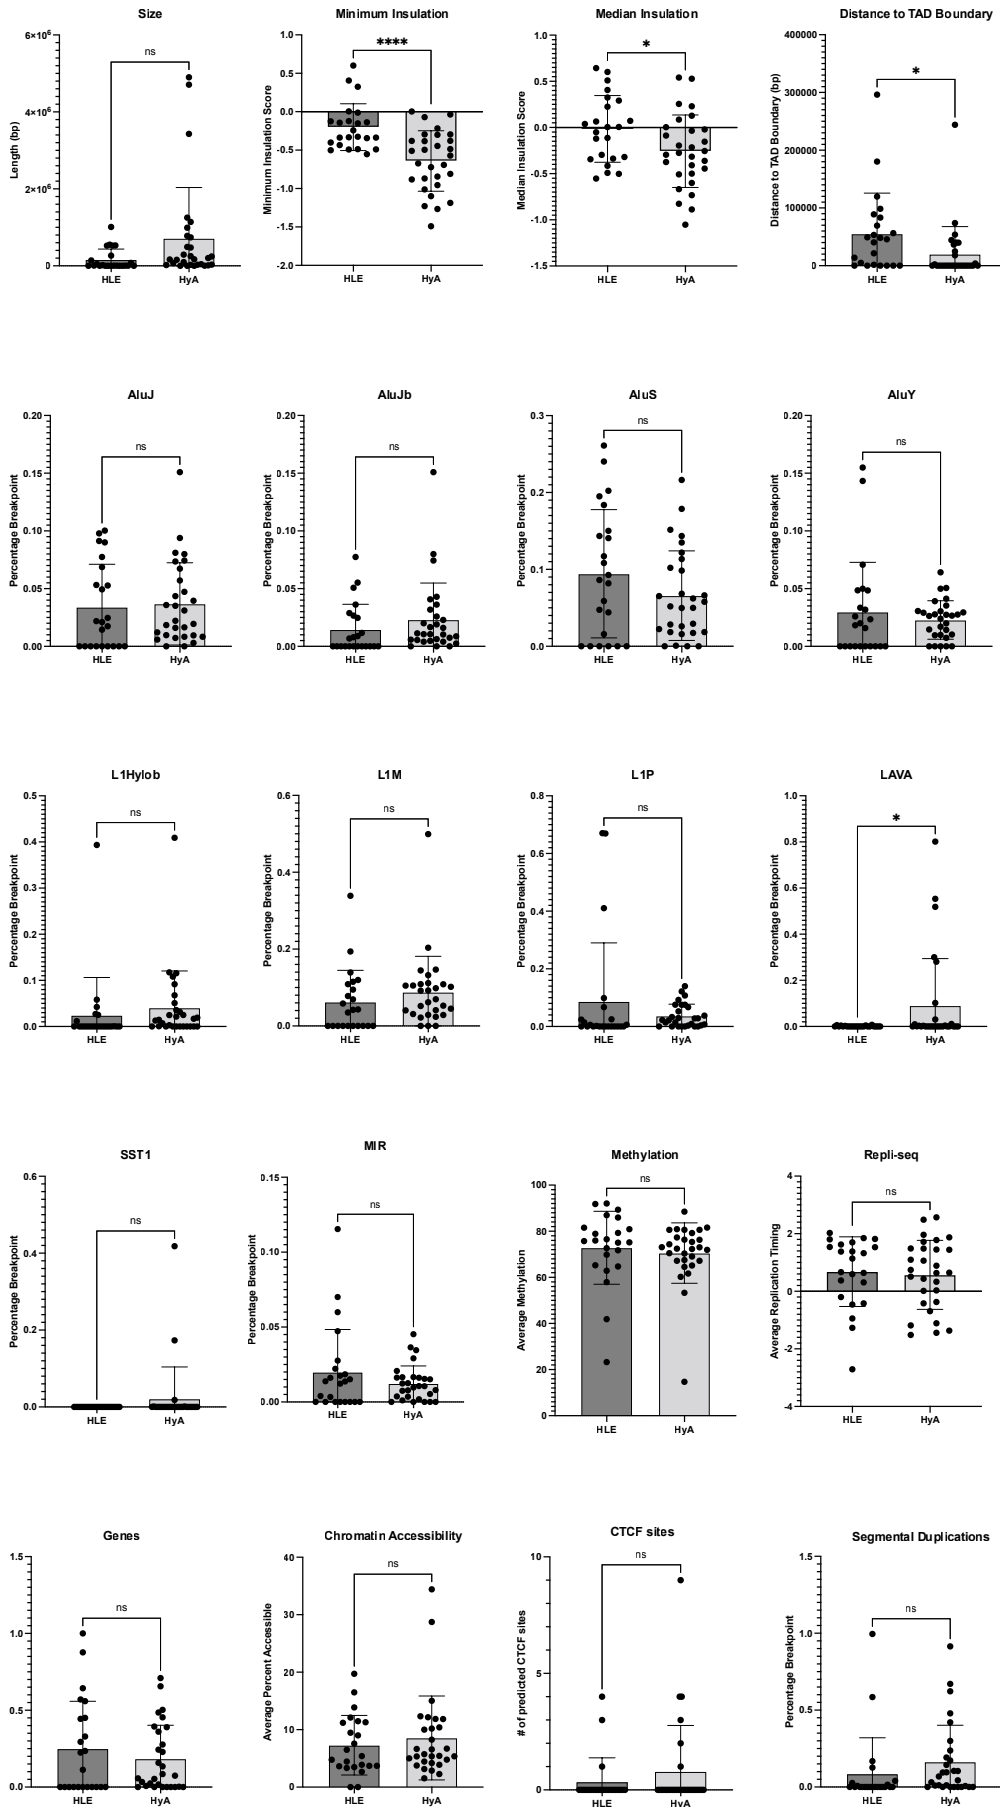

Supplement: media-1.pdf [file media-1.pdf]
